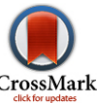

## Correction

# Correction: Association between Polymorphisms in Lysyl Oxidase-Like 1 and Susceptibility to Pseudoexfoliation Syndrome and Pseudoexfoliation Glaucoma

The *PLOS ONE* Staff

The third author's name is spelled incorrectly. The correct name is: Hua-Feng Ma. The correct citation is: Tang J-Z, Wang X-Q, Ma H-F, Wang B, Wang P-F, et al. (2014) Association between Polymorphisms in Lysyl Oxidase-Like 1 and Susceptibility to Pseudoexfoliation Syndrome and Pseudoexfoliation Glaucoma. *PLoS ONE* 9(3): e90331. doi:10.1371/journal.pone.0090331.

## Reference

1. Tang J-Z, Wang X-Q, Ma H-F, Wang B, Wang P-F, et al. (2014) Association between Polymorphisms in Lysyl Oxidase-Like 1 and Susceptibility to Pseudoexfoliation Syndrome and Pseudoexfoliation Glaucoma. *PLoS ONE* 9(3): e90331. doi:10.1371/journal.pone.0090331

**Citation:** The *PLOS ONE* Staff (2014) Correction: Association between Polymorphisms in Lysyl Oxidase-Like 1 and Susceptibility to Pseudoexfoliation Syndrome and Pseudoexfoliation Glaucoma. *PLoS ONE* 9(6): e99916. doi:10.1371/journal.pone.0099916

**Published:** June 4, 2014

**Copyright:** © 2014 The *PLOS ONE* Staff. This is an open-access article distributed under the terms of the Creative Commons Attribution License, which permits unrestricted use, distribution, and reproduction in any medium, provided the original author and source are credited.
